# Supplementary material for: Dual doping with cations and anions for enhancing the structural stability of the sodium-ion layered cathode
Source: Royal Society of Chemistry journal article supplement (doi:10.1039/d1cp05327b), 2022-01-01
Supplement: d1cp05327b1.pdf [file d1cp05327b1.pdf]

## Supporting Information

### Dual Doping with Cation and Anion for Enhancing the Structural Stability of Sodium-Ion Layered Cathode

Kyoungmin Min\*

School of Mechanical Engineering, Soongsil University, 369 Sangdo-ro, Dongjak-gu, Seoul  
06978, Republic of Korea

(a)

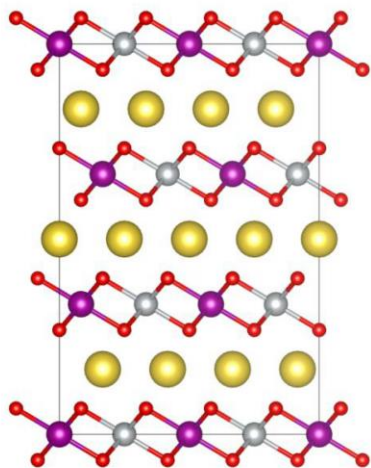

(b)

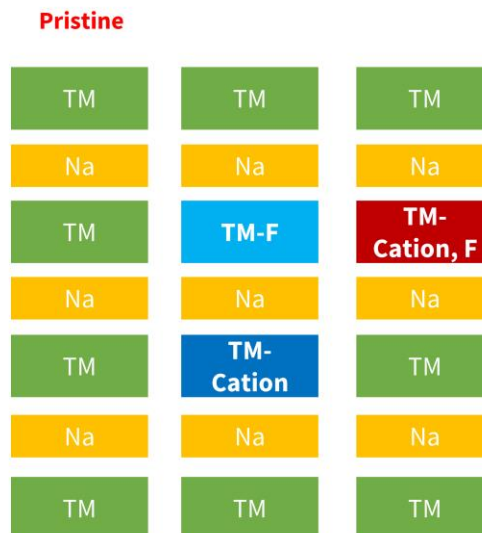

**Figure S1.** (a) Atomic structure of undoped  $\text{NaNi}_{0.5}\text{Mn}_{0.5}\text{O}_2$ . (b) Schematic view of cation and F dopant in a different (middle) and the same (right) transition metal (TM)-layer.

| Cation Dopant | Cation-F doped  |                 |                          | Change          |                 |                          |
|---------------|-----------------|-----------------|--------------------------|-----------------|-----------------|--------------------------|
|               | Lattice $a$ (Å) | Lattice $c$ (Å) | Volume (Å <sup>3</sup> ) | Lattice $a$ (Å) | Lattice $c$ (Å) | Volume (Å <sup>3</sup> ) |
| Ga            | 3.037           | 16.107          | 259.82                   | 0.0107          | 0.0746          | 4.600                    |
| Ge            | 3.059           | 16.088          | 262.48                   | 0.0289          | 0.0859          | 4.590                    |
| Hf            | 3.106           | 16.101          | 269.28                   | 0.0191          | 0.0312          | 2.730                    |
| In            | 3.101           | 16.163          | 269.88                   | 0.0187          | 0.0660          | 4.570                    |
| Pt            | 3.092           | 16.065          | 267.18                   | 0.0322          | 0.0639          | 4.710                    |
| Rh            | 3.060           | 16.049          | 261.81                   | 0.0486          | 0.0673          | 4.670                    |
| Ru            | 3.065           | 16.094          | 263.60                   | 0.0277          | 0.0669          | 4.180                    |
| Sb            | 3.139           | 16.234          | 277.63                   | 0.0316          | 0.0721          | 4.960                    |
| Te            | 3.135           | 16.230          | 277.48                   | 0.0398          | 0.0711          | 5.840                    |
| Ti            | 3.066           | 16.096          | 263.68                   | 0.0295          | 0.0877          | 4.750                    |
| Y             | 3.128           | 16.162          | 274.39                   | 0.0294          | 0.0603          | 5.310                    |
| Zr            | 3.117           | 16.156          | 272.71                   | 0.0333          | 0.0868          | 5.290                    |

**Table S1.** Lattice parameters and volume change (positive number indicates an increase) before and after doping with additional F for each cation-doped structure.

| Final Rank | Element | O3-P3      | O3-P3 (50%) | Volume (50%) | Sum  |
|------------|---------|------------|-------------|--------------|------|
|            |         | (Pristine) |             |              |      |
|            |         | Rank       | Rank        | Rank         |      |
| 1          | Te      | 3          | 3           | 1            | 8    |
| 2          | Sb      | 4          | 2           | 9            | 11.5 |
| 3          | Hf      | 11         | 1           | 3            | 14   |
| 4          | Y       | 1          | 6           | 8            | 14   |
| 5          | Ti      | 2          | 7           | 5            | 15   |
| 6          | Rh      | 8          | 4           | 7            | 17.5 |
| 7          | Pt      | 6          | 5           | 11           | 19   |
| 8          | Zr      | 5          | 9           | 10           | 23.5 |
| 9          | Ge      | 7          | 8           | 12           | 25   |
| 10         | In      | 9          | 11          | 4            | 27.5 |
| 11         | Ga      | 10         | 12          | 2            | 29   |
| 12         | Ru      | 12         | 10          | 6            | 30   |

**Table S2.** Criteria for ranking in the final list of proposed dopants. Sum =  $1.0 \times (\text{O3-P3, pristine}) + 1.5 \times (\text{O3-P3, 50\%}) + 0.5 \times (\text{volume, 50\%})$
